# Supplementary material
Source: PubMed Central journal article supplement (PMC4349439)
Supplement: NIHMS656553-supplement-1.pdf [file NIHMS656553-supplement-1.pdf]

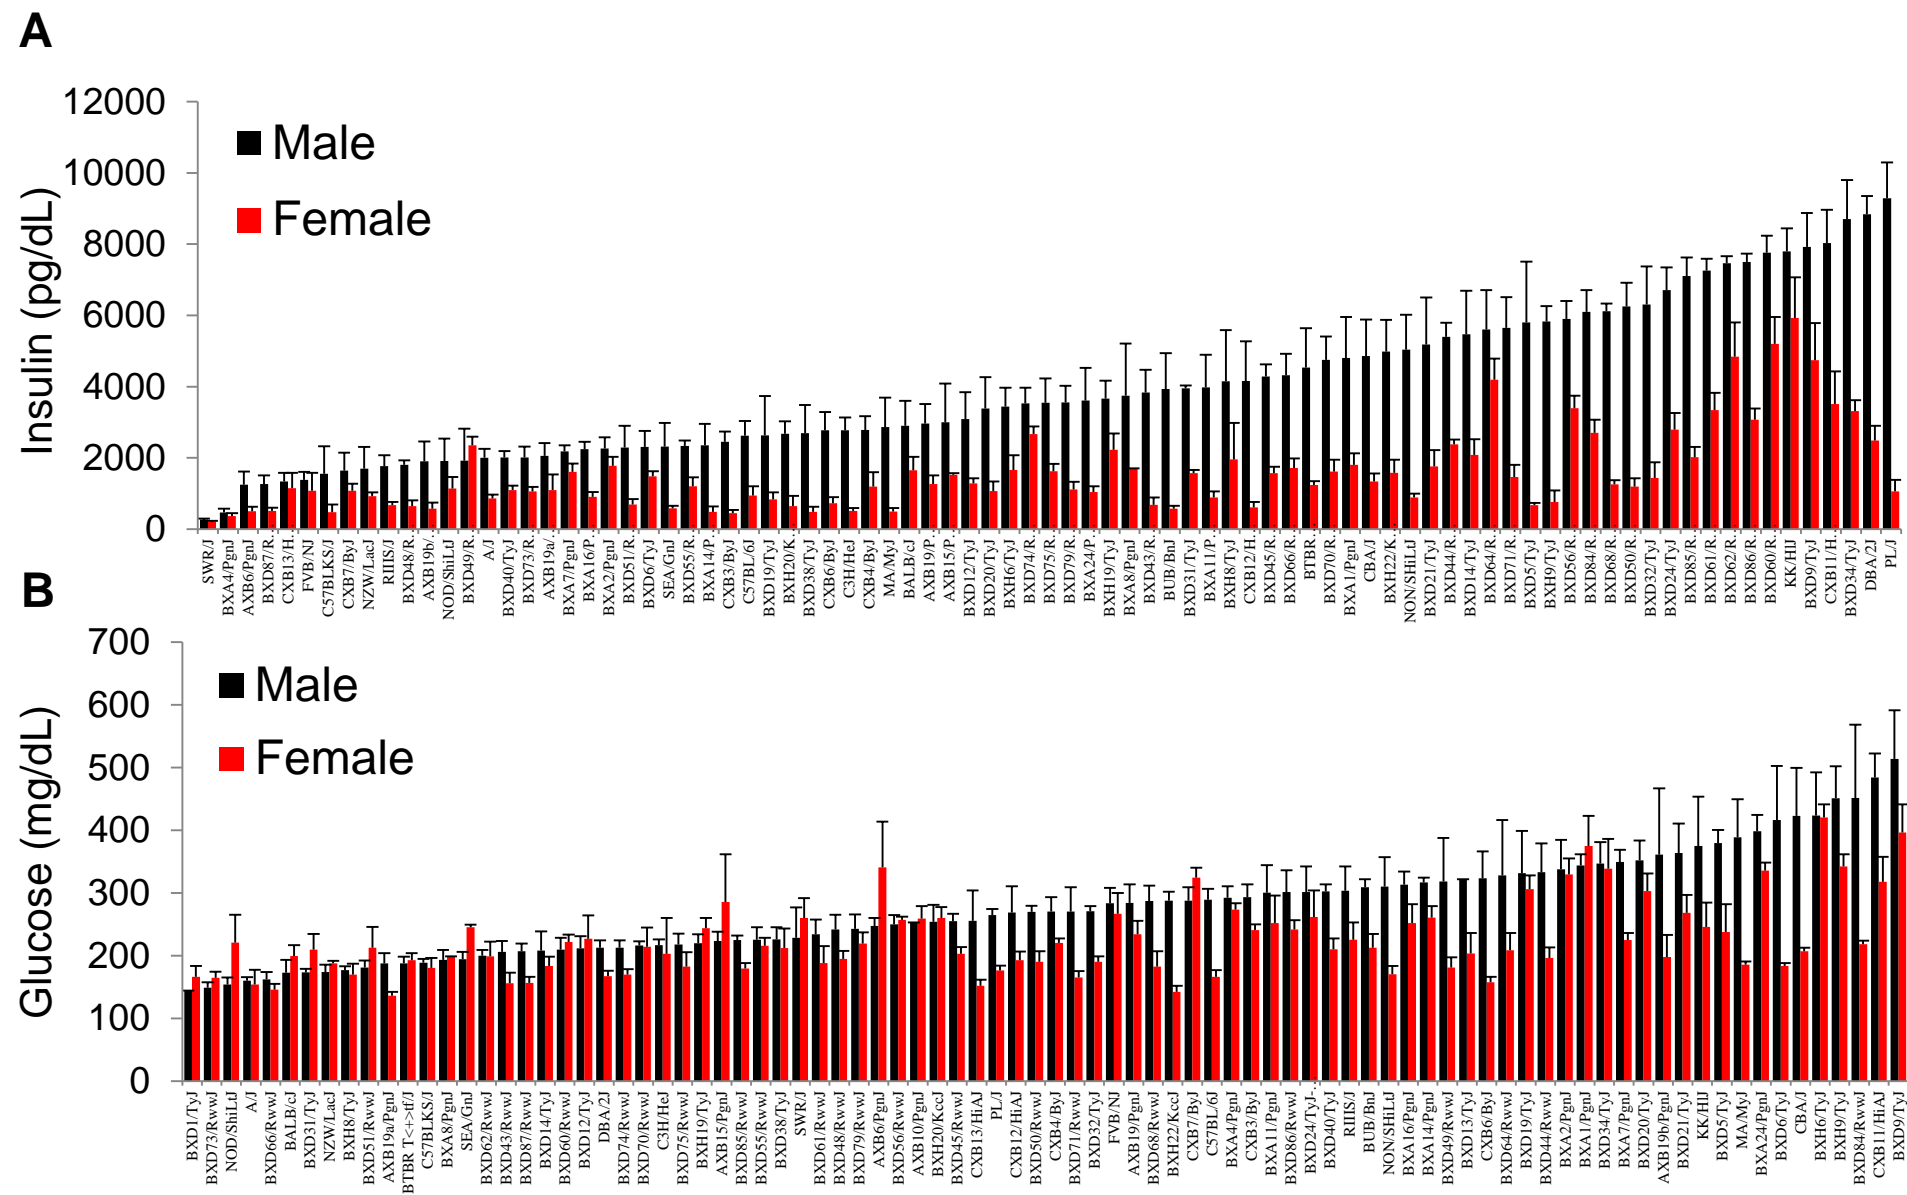

**Figure S1. Variation in plasma insulin and glucose among male and female strains, Related to Figure 1**

(A) Plasma insulin levels in male (black) and female (red) mice after 8 weeks of HF/HS feeding. Error bars represent SEM.

(B) Plasma glucose levels in male (black) and female (red) mice after 8 weeks of HF/HS feeding. Error bars represent SEM.

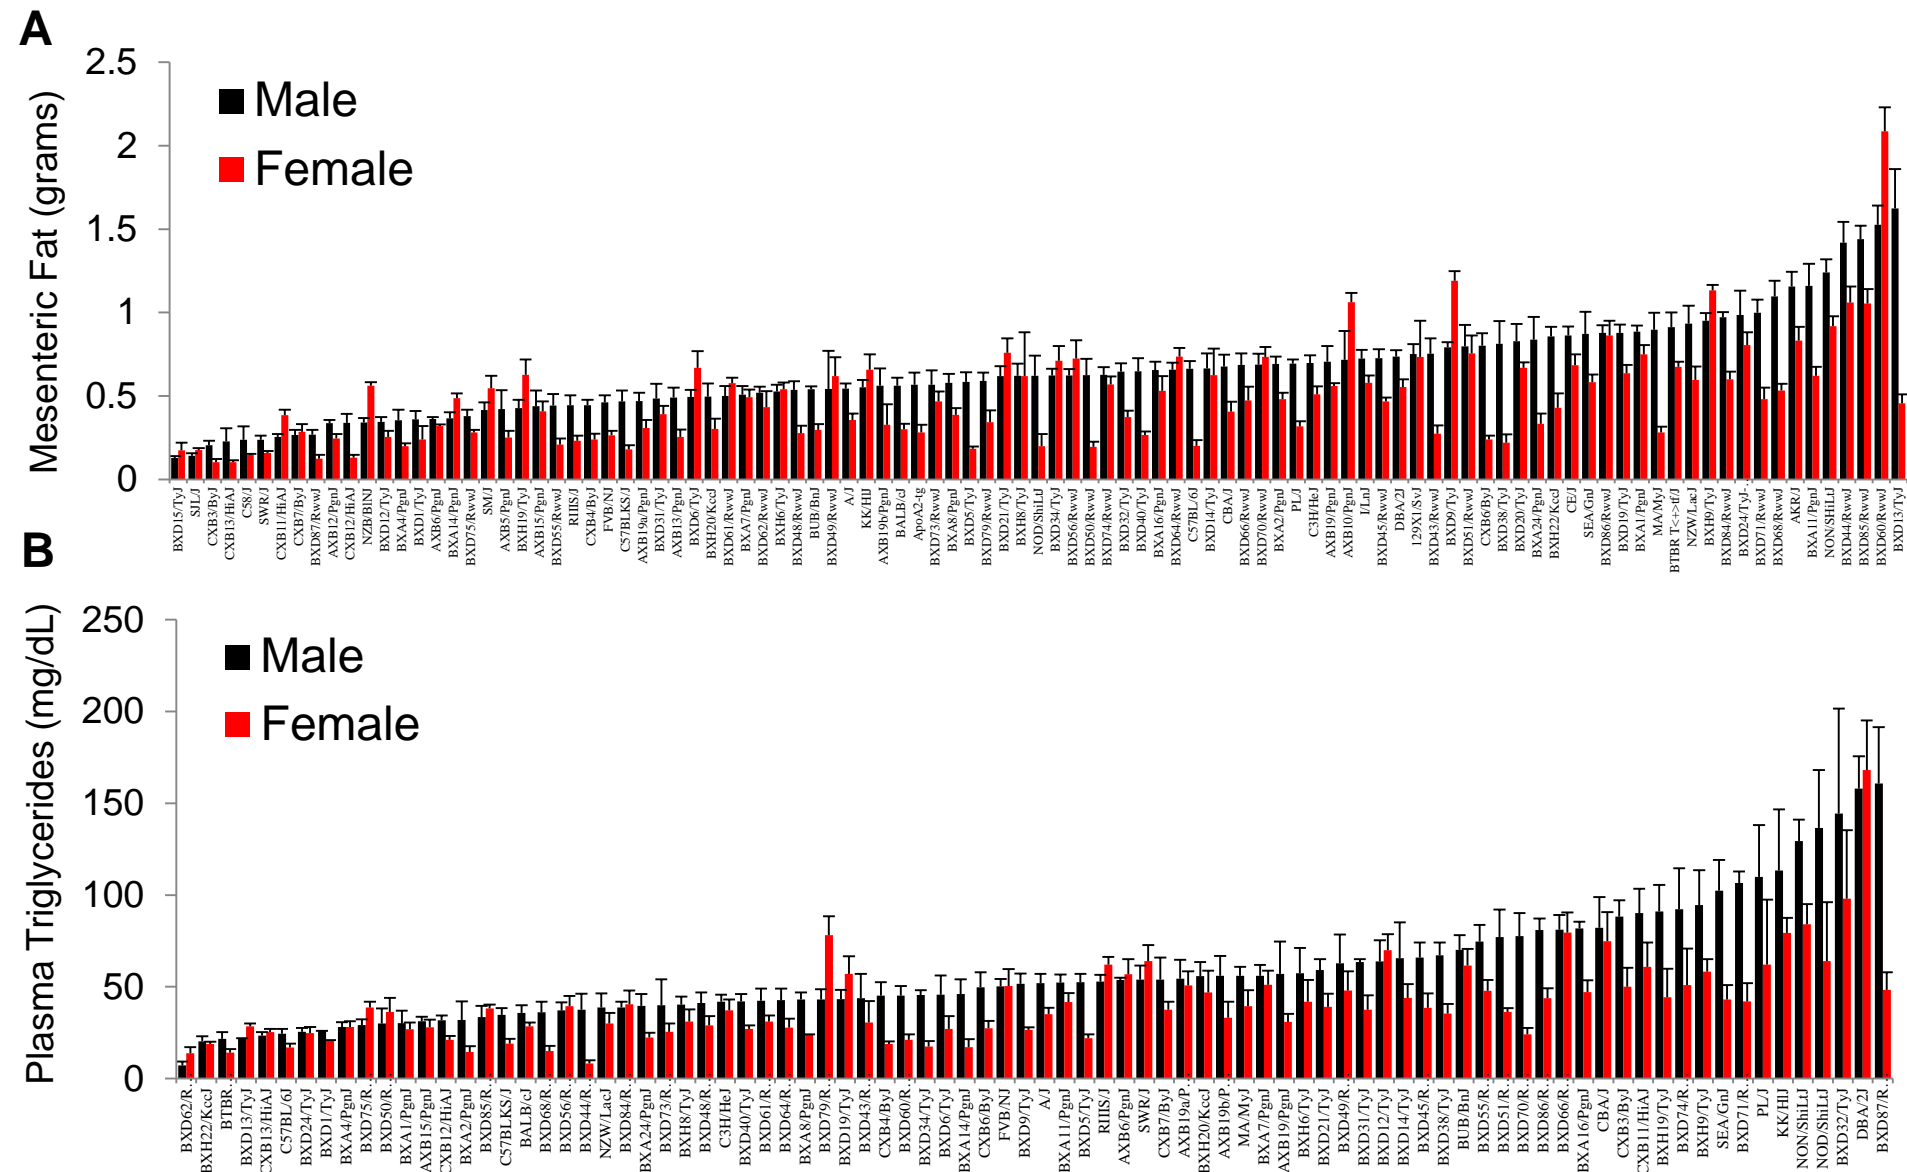

**Figure S2. Variation in central obesity and plasma triglycerides among male and female strains, Related to Figure 1**  
 (A) Mesenteric fat mass in male (black) and female (red) mice after 8 weeks of HF/HS feeding. Error bars represent SEM.  
 (B) Plasma triglyceride levels in male (black) and female (red) mice after 8 weeks of HF/HS feeding. Error bars represent SEM.

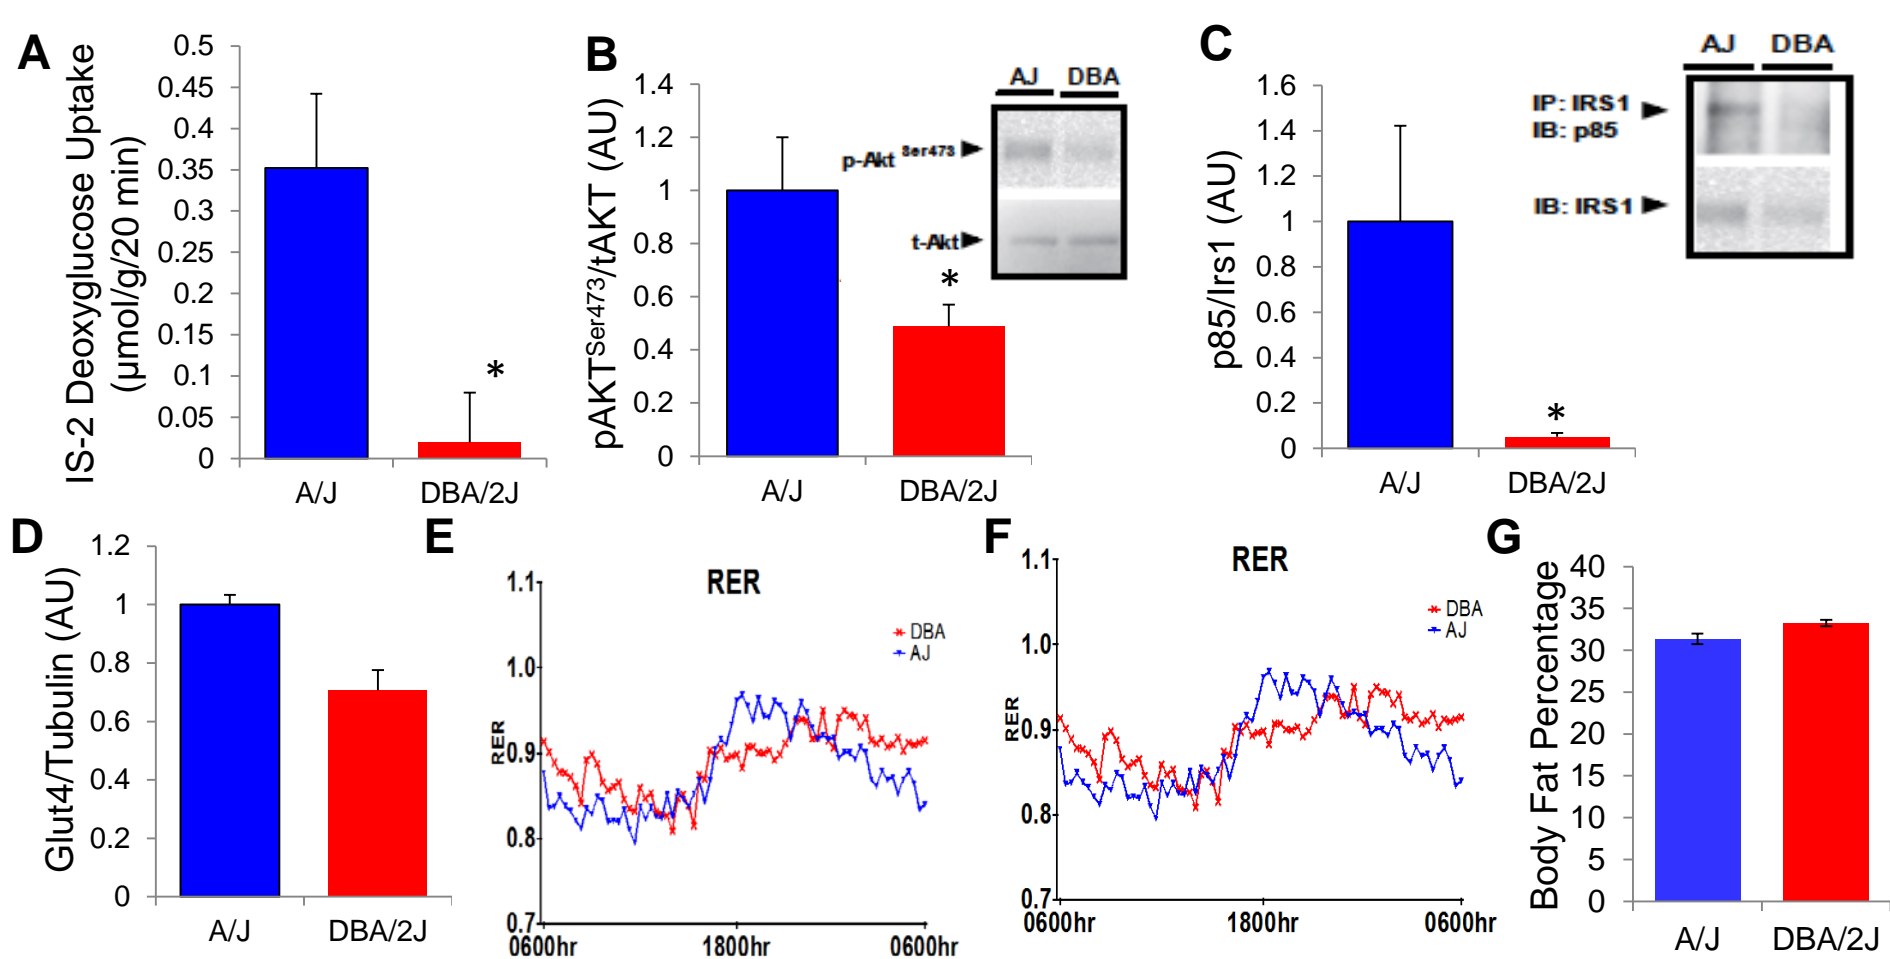

**Figure S3. Molecular analysis of IR in A/J and DBA/2J strains of mice, Related to Figure 2**

(A) Average uptake of deoxyglucose in isolated soleus muscle *in vitro* after insulin stimulation.

(B) Immunoblot analysis to detect phosphorylation of Akt on Serine 473, Average densitometry shown and representative immunoblot shown in inset.

(C) Insulin receptor substrate-1 (IRS)-1 activation was assessed by immunoprecipitation and immunoblot analysis of phosphatidylinositol (PI) 3-kinase p85 subunit association

(D) Average expression of Glut4 protein expression in soleus muscle of A/J and DBA/2J mice.

(E) Activity represented by number of beam breaks in A/J and DBA/2J mice after 8 weeks of HF/HS feeding during a 24 hour light/dark cycle.

(F) Respiratory exchange ratio (RER) in A/J and DBA/2J mice after 8 weeks of HF/HS feeding during a 24 hour light/dark cycle.

(G) Body fat percentage in A/J and DBA/2J mice after 8 weeks of HF/HS feeding.

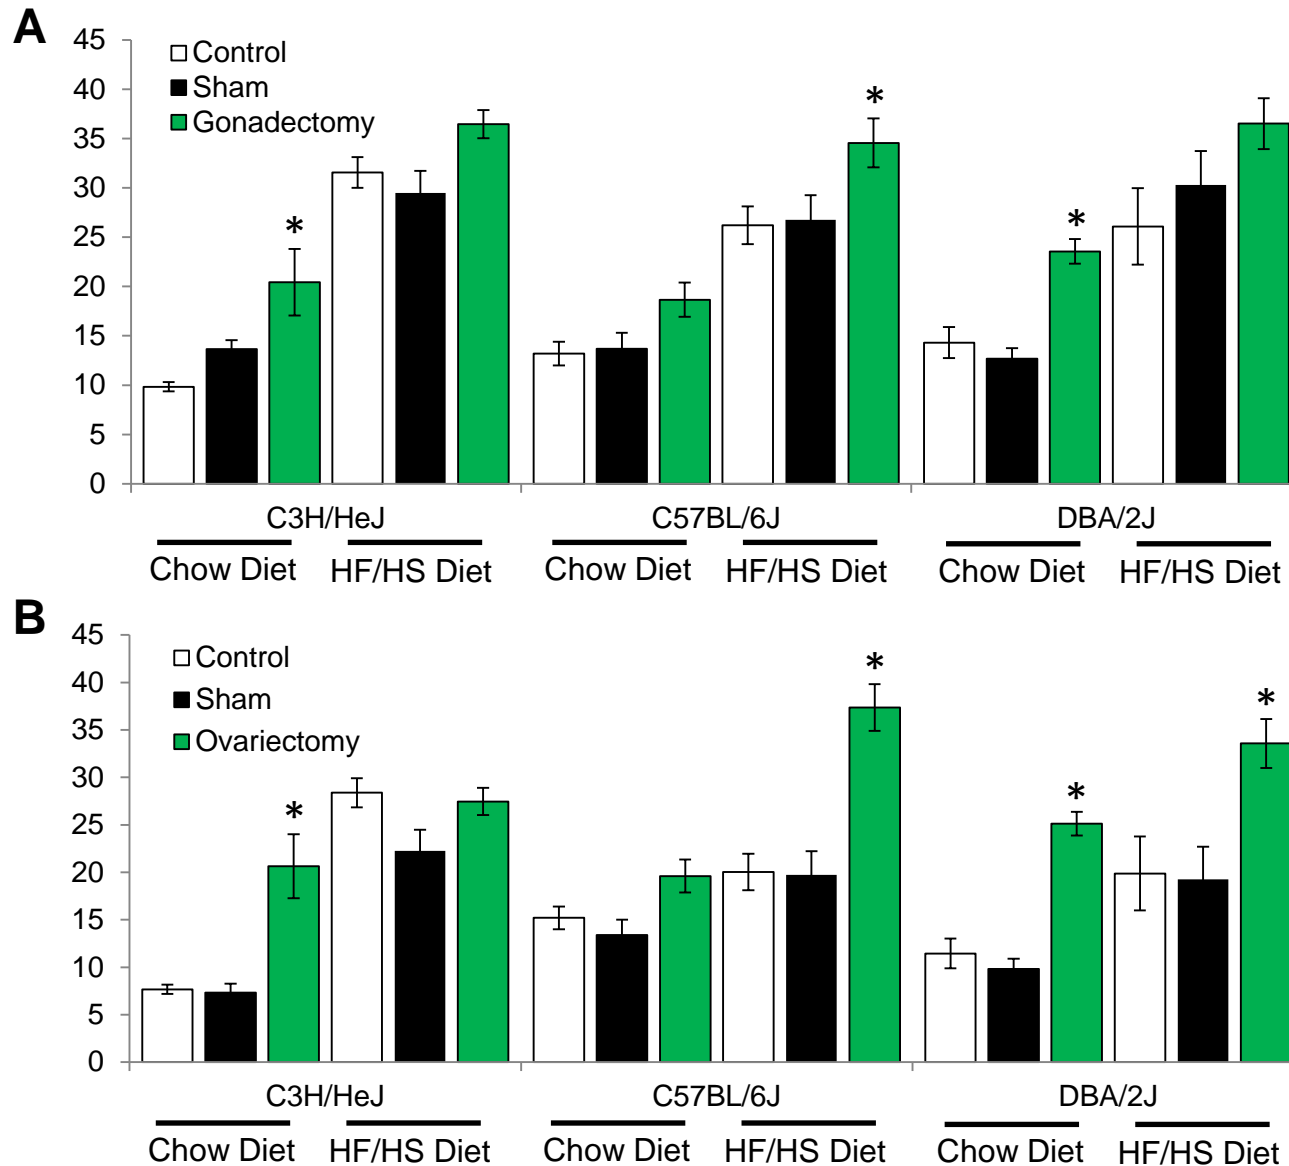

**Figure S4. Body Fat Percentage in gonadectomized and ovariectomized mice, Related to Figure 2**

(A) Average body fat percentage in male C3H/HeJ, C57BL/6J and DBA/2J mice after gonadectomy, Sham or control and being maintained on a chow or HF/HS diet for 8 weeks.

(B) Average body fat percentage in female C3H/HeJ, C57BL/6J and DBA/2J mice after ovariectomy, Sham or control and being maintained on a chow or HF/HS diet for 8 weeks. Asterisk (\*) indicates significance of  $p < 0.05$

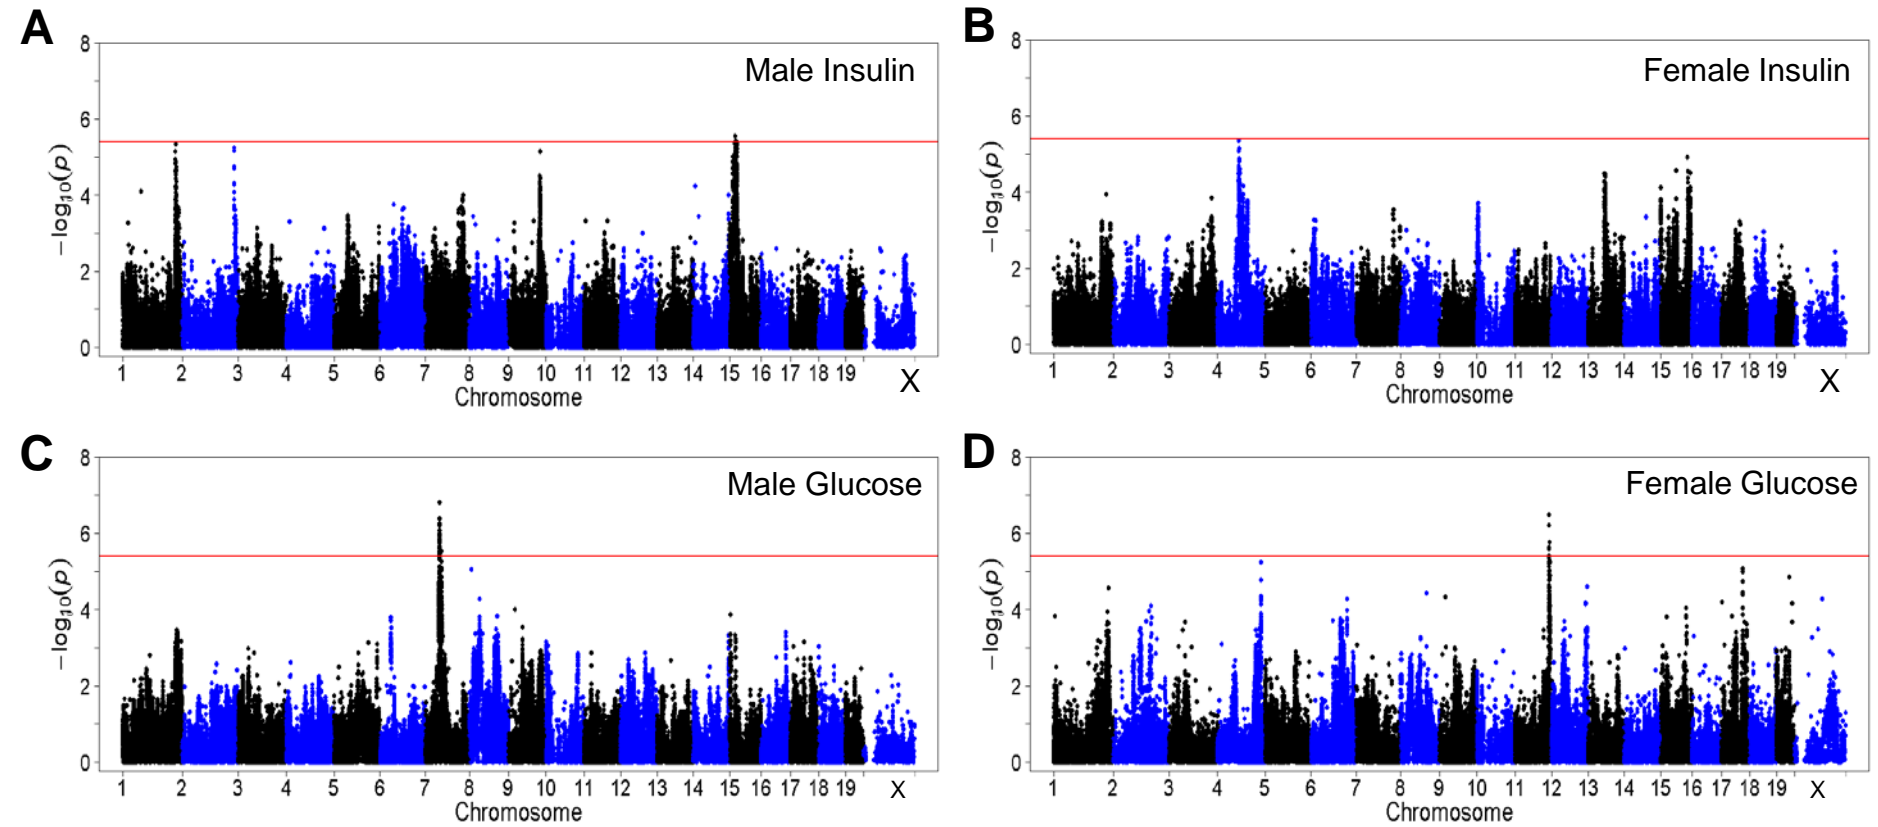

**Figure S5. GWAS for plasma insulin and glucose levels in male and female mice, Related to Figure 3**

(A-B) Manhattan plot showing the significance ( $-\log_{10}$  of  $p$ ) of all SNPs and plasma insulin levels after 8 weeks of HF/HS feeding in male mice (A) and female mice (B).

(C-D) Manhattan plot showing the significance ( $-\log_{10}$  of  $p$ ) of all SNPs and plasma glucose levels after 8 weeks of HF/HS feeding in male mice (C) and female mice (D).

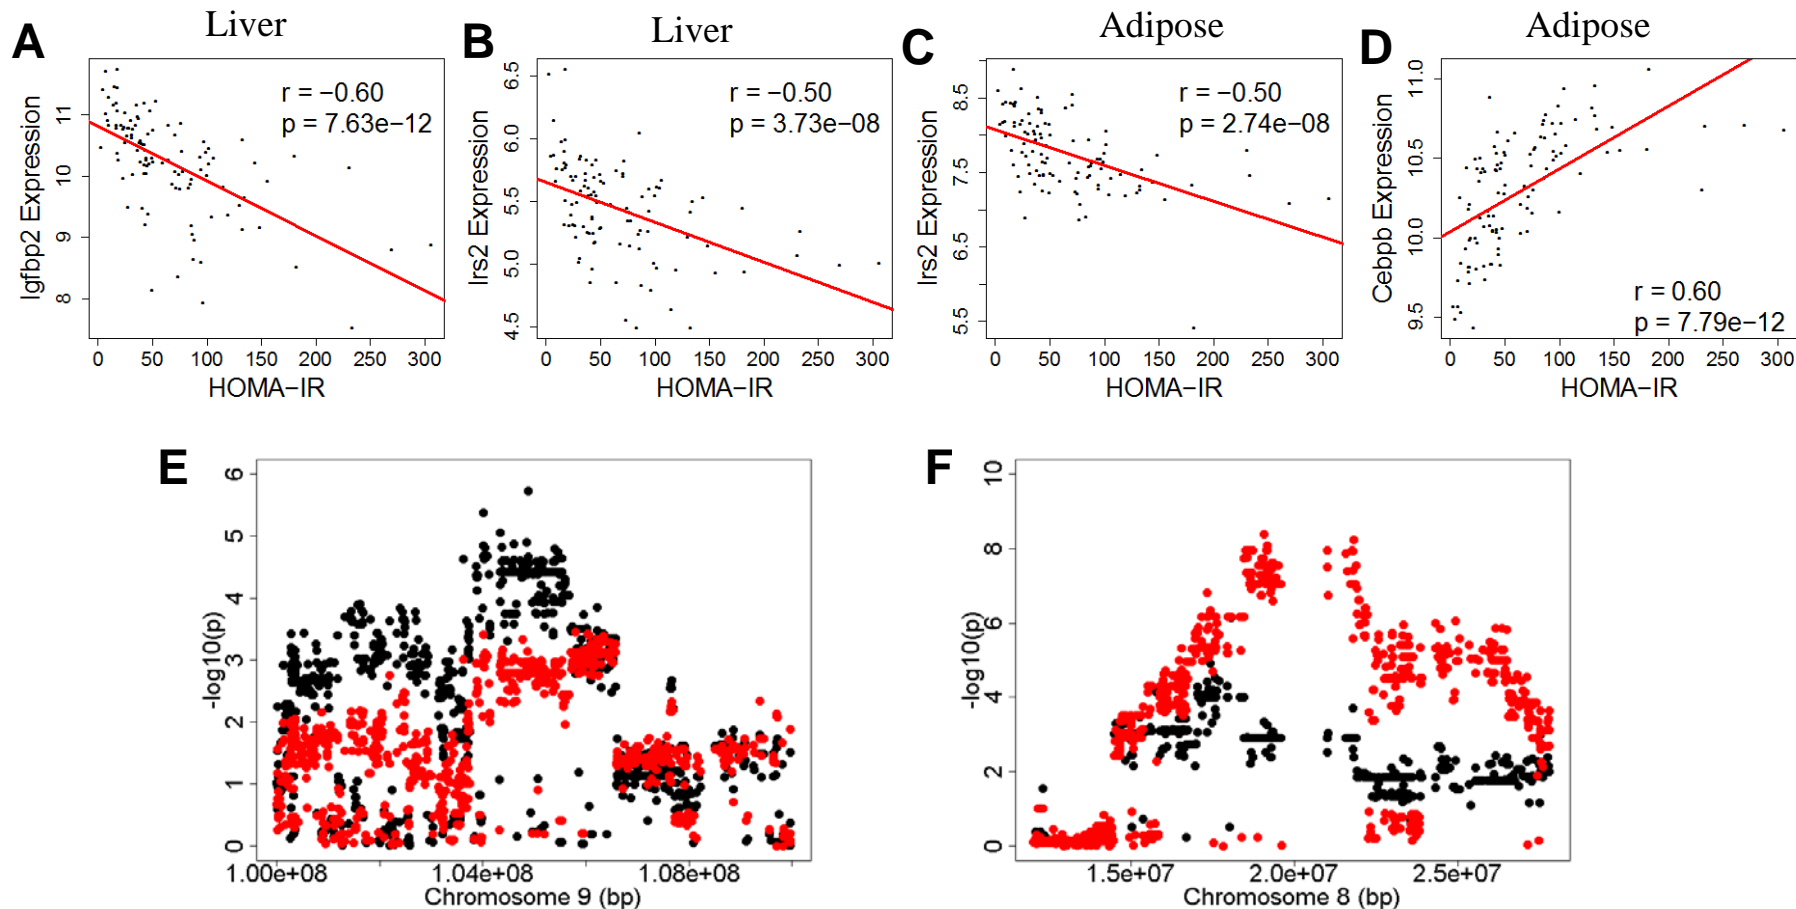

**Figure S6. Correlation of gene expression in adipose and liver with HOMA-IR, Related to Figure 4.**

(A) Correlation of *Igfbp2* expression in liver tissue with HOMA-IR, regression line (red).  $r$ , biweight midcorrelation;  $p$ ,  $p$  value.

(B) Correlation of *Irs2* expression in liver tissue with HOMA-IR, regression line (red).  $r$ , biweight midcorrelation;  $p$ ,  $p$  value.

(C) Correlation of *Irs2* expression in gonadal adipose tissue with HOMA-IR, regression line (red).  $r$ , biweight midcorrelation;  $p$ ,  $p$  value.

(D) Correlation of *Cebpb* expression in gonadal adipose tissue with HOMA-IR, regression line (red).  $r$ , biweight midcorrelation;  $p$ ,  $p$  value.

(E) Locus plot for genome-wide significant association with HOMA-IR in male mice at chromosome 9 (Black dots) and eQTL for *Acad11* (Red dots) in adipose tissue overlaid.

(F) Locus plot for genome-wide significant association with plasma insulin levels in male BXD RI mice at chromosome 8 (Black dots) and eQTL for *Agpat5* (Red dots) in adipose tissue overlaid.

**MOUSE**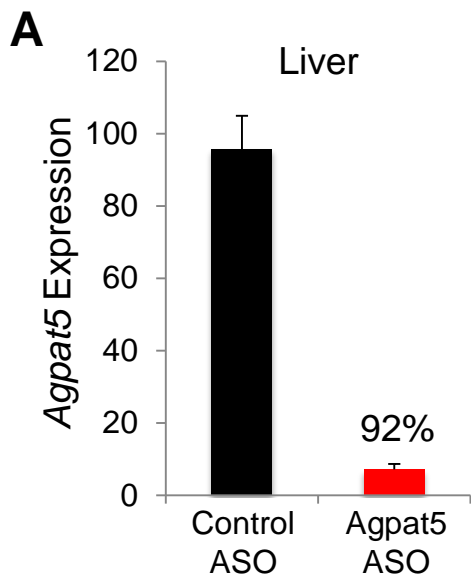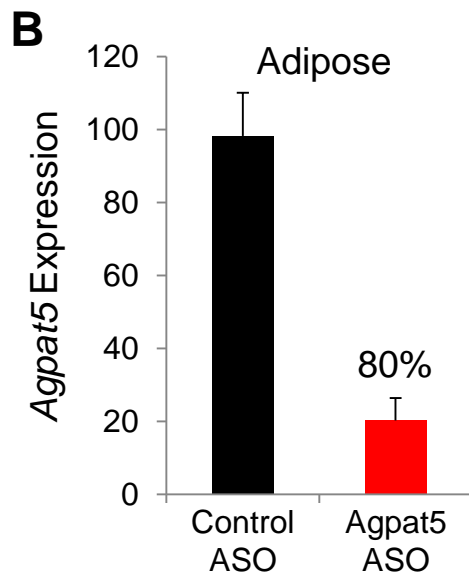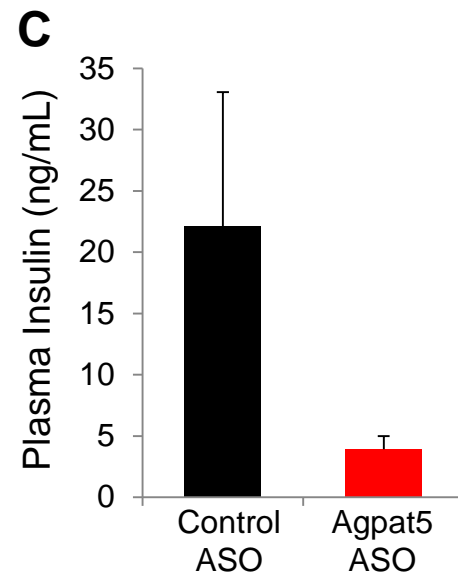**RAT**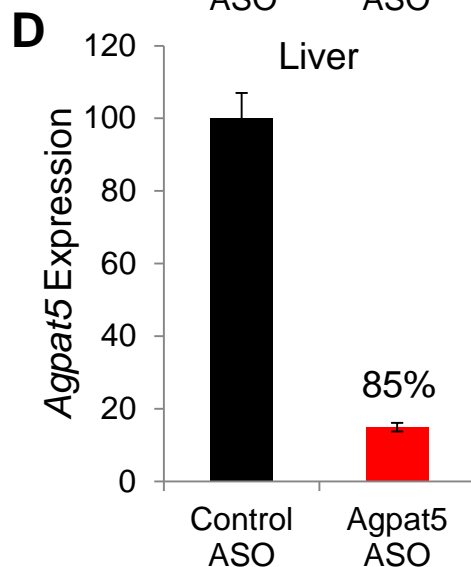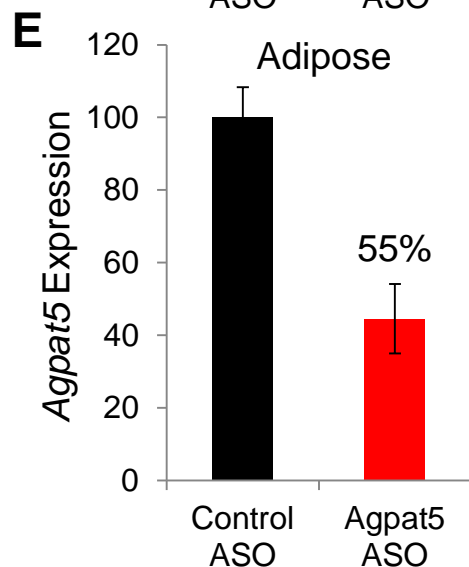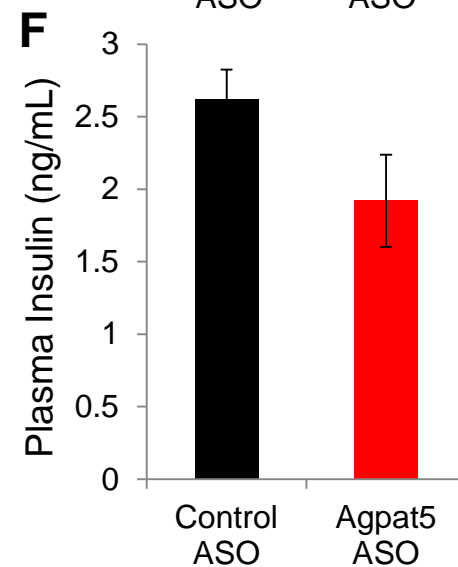

**Figure S7. Antisense Oligonucleotide knockdown of liver and Adipose *Agpat5* expression. Related to Figure 6**

(A-B) Quantitative PCR analysis of *Agpat5* expression in liver (A) and adipose (B) tissue from mice treated with control ASO or *Agpat5* ASO.

(C) Plasma insulin levels in mice treated with control ASO or *Agpat5* ASO.

(D-E) Quantitative PCR analysis of *Agpat5* expression in liver (D) and adipose (E) tissue from rats treated with control ASO or *Agpat5* ASO.

(F) Plasma insulin levels in rats treated with control ASO or *Agpat5* ASO.

**Table S1. Inbred and Recombinant Inbred Strains Included in Study, Related to Figure 1**

| Inbred Strains |      |        | Recombinant Inbred Strains |      |        |            |      |        |
|----------------|------|--------|----------------------------|------|--------|------------|------|--------|
| Strain         | Male | Female | Strain                     | Male | Female | Strain     | Male | Female |
| 129X1/SvJ      | 2    | 8      | AXB10/PgnJ                 | 3    | 4      | BXD1/TyJ   | 3    | 3      |
| A/J            | 6    | 11     | AXB12/PgnJ                 | 6    | 7      | BXD11/TyJ  |      | 3      |
| AKR/J          | 4    | 10     | AXB13/PgnJ                 | 3    | 7      | BXD12/TyJ  | 6    | 6      |
| BALB/cJ        | 12   | 16     | AXB15/PgnJ                 | 3    | 4      | BXD13/TyJ  | 4    | 3      |
| BTBR T<+> tf/J | 7    | 8      | AXB19/PgnJ                 | 7    | 6      | BXD14/TyJ  | 4    | 4      |
| BUB/BnJ        | 8    | 11     | AXB19a/PgnJ                | 5    | 7      | BXD15/TyJ  | 2    | 8      |
| C3H/HeJ        | 7    | 13     | AXB19b/PgnJ                | 5    | 5      | BXD16/TyJ  |      | 4      |
| C57BL/6J       | 15   | 24     | AXB2/PgnJ                  |      | 3      | BXD18/TyJ  |      | 3      |
| C57BLKS/J      | 8    | 8      | AXB4/PgnJ                  | 4    |        | BXD19/TyJ  | 4    | 8      |
| C57L/J         |      | 7      | AXB5/PgnJ                  | 5    | 4      | BXD21/TyJ  | 9    | 7      |
| C58/J          | 2    | 7      | AXB6/PgnJ                  | 2    | 2      | BXD24/TyJ  | 7    | 7      |
| CBA/J          | 4    | 5      | AXB8/PgnJ                  |      | 8      | BXD27/TyJ  | 7    |        |
| CE/J           | 10   | 10     | BXA1/PgnJ                  | 7    | 3      | BXD31/TyJ  | 3    | 2      |
| DBA/2J         | 14   | 21     | BXA11/PgnJ                 | 3    | 8      | BXD32/TyJ  | 4    | 7      |
| FVB/NJ         | 7    | 11     | BXA12/PgnJ                 |      | 4      | BXD34/TyJ  | 4    | 8      |
| I/LnJ          | 6    | 5      | BXA13/PgnJ                 |      | 3      | BXD36/TyJ  |      | 4      |
| KK/HIJ         | 5    | 7      | BXA14/PgnJ                 | 4    | 6      | BXD38/TyJ  | 6    | 5      |
| LG/J           |      | 8      | BXA16/PgnJ                 | 6    | 3      | BXD39/TyJ  |      | 6      |
| LP/J           | 4    |        | BXA2/PgnJ                  | 7    | 16     | BXD40/TyJ  | 8    | 4      |
| MA/MyJ         | 6    | 9      | BXA24/PgnJ                 | 6    | 10     | BXD43/RwwJ | 5    | 7      |
| NOD/ShiLtJ     | 2    | 2      | BXA4/PgnJ                  | 4    | 7      | BXD44/RwwJ | 6    | 7      |
| NON/ShiLtJ     | 6    | 6      | BXA7/PgnJ                  | 14   | 13     | BXD45/RwwJ | 5    | 6      |
| NZB/BINJ       | 4    | 8      | BXA8/PgnJ                  | 7    | 6      | BXD48/RwwJ | 9    | 8      |
| NZW/LacJ       | 7    | 6      | BXH19/TyJ                  | 3    | 6      | BXD49/RwwJ | 4    | 4      |
| PL/J           | 6    | 6      | BXH2/TyJ                   |      | 3      | BXD5/TyJ   | 2    | 5      |
| RIIS/J         | 8    | 8      | BXH20/KccJ                 | 3    | 3      | BXD50/RwwJ | 6    | 5      |
| SEA/GnJ        | 8    | 8      | BXH22/KccJ                 | 7    | 6      | BXD51/RwwJ | 4    | 4      |
| SJL/J          | 6    | 8      | BXH4/TyJ                   |      | 4      | BXD55/RwwJ | 11   | 9      |
| SM/J           | 6    | 5      | BXH6/TyJ                   | 8    | 7      | BXD56/RwwJ | 2    | 9      |
| SWR/J          | 7    | 10     | BXH8/TyJ                   | 4    | 3      | BXD6/TyJ   | 2    | 7      |
|                |      |        | BXH9/TyJ                   | 3    | 7      | BXD60/RwwJ | 7    | 4      |
|                |      |        | CXB11/HiAJ                 | 8    | 6      | BXD61/RwwJ | 8    | 7      |
|                |      |        | CXB12/HiAJ                 | 8    | 7      | BXD62/RwwJ | 6    | 12     |
|                |      |        | CXB13/HiAJ                 | 9    | 7      | BXD64/RwwJ | 8    | 7      |
|                |      |        | CXB3/ByJ                   | 6    | 7      | BXD66/RwwJ | 7    | 7      |
|                |      |        | CXB4/ByJ                   | 6    | 6      | BXD68/RwwJ | 7    | 6      |
|                |      |        | CXB6/ByJ                   | 6    | 7      | BXD69/RwwJ | 2    |        |
|                |      |        | CXB7/ByJ                   | 7    | 7      | BXD70/RwwJ | 9    | 6      |
|                |      |        |                            |      |        | BXD71/RwwJ | 9    | 9      |
|                |      |        |                            |      |        | BXD73/RwwJ | 7    | 11     |
|                |      |        |                            |      |        | BXD74/RwwJ | 6    | 6      |
|                |      |        |                            |      |        | BXD75/RwwJ | 4    | 7      |
|                |      |        |                            |      |        | BXD79/RwwJ | 6    | 10     |
|                |      |        |                            |      |        | BXD8/TyJ   |      | 2      |
|                |      |        |                            |      |        | BXD84/RwwJ | 12   | 10     |
|                |      |        |                            |      |        | BXD85/RwwJ | 6    | 8      |
|                |      |        |                            |      |        | BXD86/RwwJ | 7    | 8      |
|                |      |        |                            |      |        | BXD87/RwwJ | 8    | 8      |
|                |      |        |                            |      |        | BXD9/TyJ   | 4    | 4      |



**Table S2. Significant cis expression QTL and Metabolites at HOMA-IR, Related to Figure 4**

| Trait              | Chr           | Peak SNP   | Tissue             | Gene or Metabolite | Gene Start Position | pvalue     |        |           |          |
|--------------------|---------------|------------|--------------------|--------------------|---------------------|------------|--------|-----------|----------|
| HOMA-IR            | 1             | rs32316569 | Adipose            | Mndal              | 173857220           | 1.50E-39   |        |           |          |
|                    |               |            | Adipose            | Pyhin1             | 173630859           | 9.65E-29   |        |           |          |
|                    |               |            | Adipose            | Grem2              | 174833785           | 5.43E-11   |        |           |          |
|                    |               |            | Adipose            | Ifi203             | 173920407           | 5.36E-10   |        |           |          |
|                    |               |            | Adipose            | Fh1                | 175600374           | 0.000179   |        |           |          |
|                    |               |            | Adipose            | Cadm3              | 173334254           | 0.001      |        |           |          |
|                    |               |            | Liver              | Mndal              | 173857220           | 2.24E-47   |        |           |          |
|                    |               |            | Liver              | Fmn2               | 174501825           | 7.95E-17   |        |           |          |
|                    |               |            | Liver              | Ifi203             | 173920407           | 3.02E-12   |        |           |          |
|                    |               |            | Plasma Metabolites | glycerol           | NA                  | 0.00234991 |        |           |          |
|                    |               |            | Plasma Metabolites | taurine            | NA                  | 0.0095629  |        |           |          |
|                    |               |            | HOMA-IR            | 9                  | rs36804270          | Adipose    | Parp3  | 106470322 | 8.40E-22 |
|                    |               |            |                    |                    |                     | Adipose    | Ppm1m  | 106194172 | 1.04E-18 |
|                    |               |            |                    |                    |                     | Adipose    | Glyctk | 106152857 | 1.33E-16 |
| Adipose            | Dusp7         | 106368632  |                    |                    |                     | 3.51E-14   |        |           |          |
| Adipose            | Abhd14b       | 106448640  |                    |                    |                     | 4.22E-13   |        |           |          |
| Adipose            | Ackr4         | 104098138  |                    |                    |                     | 1.68E-12   |        |           |          |
| Adipose            | Abhd14a       | 106440051  |                    |                    |                     | 3.86E-12   |        |           |          |
| Adipose            | Pik3r4        | 105642995  |                    |                    |                     | 2.62E-07   |        |           |          |
| Adipose            | Nudt16        | 105129338  |                    |                    |                     | 6.55E-06   |        |           |          |
| Adipose            | Atp2c1        | 105403539  |                    |                    |                     | 4.59E-05   |        |           |          |
| Adipose            | Acy1          | 106432996  |                    |                    |                     | 0.000228   |        |           |          |
| Adipose            | Twf2          | 106203108  |                    |                    |                     | 0.000246   |        |           |          |
| Adipose            | Uba5          | 104046599  |                    |                    |                     | 0.000272   |        |           |          |
| Adipose            | Acad11        | 104040662  |                    |                    |                     | 0.00033    |        |           |          |
| Liver              | Abhd14b       | 106448640  |                    |                    |                     | 2.74E-18   |        |           |          |
| Liver              | Ppm1m         | 106194172  |                    |                    |                     | 3.78E-17   |        |           |          |
| Liver              | Abhd14a       | 106440051  |                    |                    |                     | 4.04E-12   |        |           |          |
| Liver              | Acy1          | 106432996  |                    |                    |                     | 3.93E-08   |        |           |          |
| Liver              | Mrpl3         | 105053239  |                    |                    |                     | 8.75E-08   |        |           |          |
| Liver              | Pcbp4         | 106453838  |                    |                    |                     | 1.14E-07   |        |           |          |
| Liver              | Glyctk        | 106152857  |                    |                    |                     | 1.46E-07   |        |           |          |
| Liver              | 1300017J02Rik | 103250522  |                    |                    |                     | 2.10E-06   |        |           |          |
| Liver              | Nudt16        | 105129338  |                    |                    |                     | 2.68E-06   |        |           |          |
| Liver              | Parp3         | 106470322  |                    |                    |                     | 4.93E-05   |        |           |          |
| Liver              | Uba5          | 104046599  |                    |                    |                     | 0.000295   |        |           |          |
| Liver              | Dusp7         | 106368632  |                    |                    |                     | 0.000407   |        |           |          |
| Liver              | Pcbp4         | 106453838  |                    |                    |                     | 0.00041    |        |           |          |
| Liver              | Pik3r4        | 105642995  |                    |                    |                     | 0.000687   |        |           |          |
| Liver              | Acpp          | 104288251  |                    |                    |                     | 0.000792   |        |           |          |
| Plasma Metabolites | Arginine      | NA         |                    |                    |                     | 0.000676   |        |           |          |
| Plasma Metabolites | Niacinamide   | NA         |                    |                    |                     | 0.009976   |        |           |          |

**Table S3. Top 50 Liver Genes Correlated With HOMA-IR, Related to Figure 4**

| <b>Rank</b> | <b>r</b> | <b>p</b> | <b>Gene symbol</b> |
|-------------|----------|----------|--------------------|
| 1           | -0.65    | 2.05E-23 | Igfbp2             |
| 2           | -0.60    | 1.60E-19 | Fbxo21             |
| 3           | 0.60     | 2.85E-19 | Rcan1              |
| 4           | 0.58     | 1.21E-17 | Mogat1             |
| 5           | 0.57     | 1.61E-17 | Cd36               |
| 6           | 0.57     | 2.18E-17 | Anxa2              |
| 7           | -0.56    | 1.12E-16 | Avpr1a             |
| 8           | -0.56    | 2.41E-16 | Apom               |
| 9           | -0.55    | 6.05E-16 | Abca8a             |
| 10          | 0.55     | 8.11E-16 | Smarca4            |
| 11          | 0.54     | 1.35E-15 | Uck1               |
| 12          | 0.54     | 1.67E-15 | S100a10            |
| 13          | 0.54     | 1.94E-15 | Ermp1              |
| 14          | 0.54     | 2.37E-15 | Exoc4              |
| 15          | 0.54     | 4.36E-15 | Tmem43             |
| 16          | -0.53    | 6.30E-15 | Rbbp4              |
| 17          | 0.53     | 7.53E-15 | Dak                |
| 18          | 0.53     | 1.05E-14 | Entpd5             |
| 19          | 0.53     | 1.38E-14 | Spc25              |
| 20          | -0.53    | 1.95E-14 | Irs2               |
| 21          | 0.52     | 2.03E-14 | Chpt1              |
| 22          | 0.52     | 2.37E-14 | Hsd17b12           |
| 23          | 0.52     | 2.70E-14 | Gpc1               |
| 24          | 0.52     | 6.04E-14 | Ccng1              |
| 25          | -0.51    | 7.79E-14 | Foxp1              |
| 26          | -0.51    | 1.26E-13 | Cyp27a1            |
| 27          | 0.51     | 2.41E-13 | Lgals1             |
| 28          | 0.50     | 3.52E-13 | Fam73b             |
| 29          | -0.50    | 3.63E-13 | Scarb1             |
| 30          | -0.50    | 3.72E-13 | Pdia5              |
| 31          | 0.50     | 4.01E-13 | Pthr2              |
| 32          | -0.50    | 6.18E-13 | Fermt2             |
| 33          | -0.50    | 6.23E-13 | Gpld1              |
| 34          | 0.50     | 6.77E-13 | Xpot               |
| 35          | 0.50     | 8.61E-13 | Cmpk1              |
| 36          | -0.49    | 9.39E-13 | Srsf5              |
| 37          | 0.49     | 9.54E-13 | Mad2l1             |
| 38          | -0.49    | 1.01E-12 | Maf1               |
| 39          | 0.49     | 1.35E-12 | Wfdc2              |
| 40          | 0.48     | 3.99E-12 | Fmo5               |
| 41          | 0.48     | 4.66E-12 | Smc2               |
| 42          | -0.48    | 4.68E-12 | Slc8b1             |
| 43          | -0.48    | 4.80E-12 | Ces2a              |
| 44          | 0.48     | 5.08E-12 | Ces2e              |
| 45          | -0.48    | 5.16E-12 | Fetub              |
| 46          | 0.48     | 5.19E-12 | Mettl9             |
| 47          | -0.48    | 6.68E-12 | Rpl10a             |
| 48          | 0.48     | 6.77E-12 | Srxn1              |
| 49          | -0.48    | 9.45E-12 | Cyp1a2             |
| 50          | 0.47     | 9.68E-12 | BC029722           |

**Table S4. Top 50 Adipose Genes Correlated With HOMA-IR, Related to Figure 4**

| <b>Rank</b> | <b>r</b> | <b>p</b> | <b>Gene symbol</b> |
|-------------|----------|----------|--------------------|
| 1           | -0.64    | 5.87E-24 | Chst1              |
| 2           | -0.63    | 1.68E-23 | Pde1a              |
| 3           | -0.63    | 3.59E-23 | Tab3               |
| 4           | -0.62    | 9.36E-23 | Rrm2b              |
| 5           | -0.62    | 5.03E-22 | Jup                |
| 6           | -0.61    | 9.26E-22 | Zrsr1              |
| 7           | -0.61    | 1.09E-21 | Xpc                |
| 8           | -0.61    | 1.87E-21 | Chrdl1             |
| 9           | -0.61    | 2.54E-21 | Sort1              |
| 10          | -0.60    | 5.45E-21 | Ndrg1              |
| 11          | -0.60    | 5.84E-21 | Cfd                |
| 12          | 0.60     | 7.68E-21 | Cd72               |
| 13          | -0.60    | 1.25E-20 | Ube2h              |
| 14          | -0.60    | 1.26E-20 | Ganc               |
| 15          | -0.60    | 1.67E-20 | Agbl3              |
| 16          | -0.60    | 1.70E-20 | Pink1              |
| 17          | -0.59    | 2.63E-20 | Cenpv              |
| 18          | -0.59    | 3.78E-20 | Ivns1abp           |
| 19          | 0.59     | 3.81E-20 | Cebpb              |
| 20          | -0.59    | 3.82E-20 | 2310010J17Rik      |
| 21          | -0.59    | 4.09E-20 | Pck1               |
| 22          | 0.59     | 4.71E-20 | Dnmt3l             |
| 23          | -0.59    | 4.91E-20 | Mgst3              |
| 24          | -0.59    | 5.80E-20 | Gm10374            |
| 25          | -0.59    | 5.96E-20 | Apcdd1             |
| 26          | -0.59    | 6.07E-20 | Osbpl1a            |
| 27          | 0.59     | 6.33E-20 | Dhcr7              |
| 28          | -0.59    | 6.81E-20 | Nrbp2              |
| 29          | 0.59     | 8.11E-20 | Dera               |
| 30          | 0.59     | 1.06E-19 | Spc25              |
| 31          | 0.58     | 2.99E-19 | Csk                |
| 32          | -0.58    | 4.05E-19 | Gkap1              |
| 33          | -0.58    | 4.50E-19 | Tmem134            |
| 34          | -0.58    | 4.99E-19 | Hoxa7              |
| 35          | -0.58    | 5.79E-19 | Anapc13            |
| 36          | 0.58     | 7.60E-19 | Asf1b              |
| 37          | -0.57    | 8.36E-19 | Ophn1              |
| 38          | -0.57    | 8.60E-19 | Glx2               |
| 39          | 0.57     | 1.06E-18 | Mvd                |
| 40          | -0.57    | 1.28E-18 | Adh5               |
| 41          | -0.57    | 1.62E-18 | Surf1              |
| 42          | -0.57    | 1.62E-18 | Ncor1              |
| 43          | -0.57    | 1.92E-18 | Fdx1               |
| 44          | -0.57    | 1.96E-18 | Irs2               |
| 45          | 0.57     | 3.17E-18 | Neddd4l            |
| 46          | -0.57    | 3.38E-18 | Ghr                |
| 47          | -0.57    | 3.75E-18 | Mst1r              |
| 48          | 0.57     | 3.97E-18 | Plin2              |
| 49          | -0.57    | 4.20E-18 | Las1l              |
| 50          |          |          |                    |

**Table S5. Genome-wide significant plasma metabolite QTL (mQTL), Related to Figure 5**

| Trait                  | Chr. | Peak SNP   | Position (Mb) | P-Value  | MAF   | LD          | No. of Genes |
|------------------------|------|------------|---------------|----------|-------|-------------|--------------|
| Adenosine              | 13   | rs6399032  | 5387909       | 1.07E-07 | 0.055 | 3.0-12.2    | 35           |
| Adenosine              | 6    | rs50509130 | 12586105      | 1.08E-07 | 0.054 | 12.5-15.8   | 11           |
| Adenosine              | 17   | rs50773521 | 49379896      | 3.10E-06 | 0.057 | 48.1-49.4   | 17           |
| Adenosine              | 19   | rs37149042 | 24778607      | 3.57E-06 | 0.054 | 24.2-25.2   | 9            |
| Adenosine              | 11   | rs26906284 | 68380725      | 3.60E-06 | 0.054 | 67.8-68.4   | 5            |
| Adenosine              | 17   | rs49862571 | 72179790      | 3.33E-06 | 0.059 | 71.1-72.3   | 17           |
| Cystamine              | 7    | rs50538240 | 148061082     | 3.09E-08 | 0.20  | 147.4-149.4 | 77           |
| Glutamine              | 6    | rs37155646 | 31876349      | 2.35E-06 | 0.081 | 27.7-32.0   | 40           |
| Glycerol               | 3    | rs31076351 | 62716836      | 1.95E-07 | 0.086 | 60.9-65.2   | 19           |
| Glycerol               | 14   | rs51980658 | 101088554     | 5.46E-07 | 0.054 | 100.0-113.0 | 24           |
| Glycerol               | 15   | rs31600615 | 79165941      | 9.66E-07 | 0.12  | 79.1-79.2   | 3            |
| Glycerol               | 8    | rs32824270 | 47366716      | 9.68E-07 | 0.087 | 44.5-48.1   | 28           |
| Glycerol               | 8    | rs51588257 | 12302705      | 1.21E-06 | 0.054 | 8.8-12.7    | 25           |
| Glycerol               | 19   | rs30767320 | 19916451      | 1.95E-06 | 0.40  | 17.0-20.1   | 9            |
| Glycerol               | 16   | rs33359909 | 75508760      | 2.33E-06 | 0.06  | 75.5-77.2   | 6            |
| Glycerol               | 15   | rs31901221 | 18654064      | 3.86E-06 | 0.054 | 16.4-20.7   | 3            |
| Kynurenic Acid         | 11   | rs3661285  | 90007992      | 2.62E-06 | 0.075 | 87.1-93.0   | 43           |
| Phosphocholine         | 2    | rs27441517 | 119932775     | 5.04E-08 | 0.065 | 119.4-120.0 | 15           |
| 2 Deoxyadenosine       | 12   | rs37817859 | 107067975     | 2.88E-06 | 0.13  | 106.7-108.7 | 8            |
| 2 Deoxycytidine        | 12   | rs46185976 | 4372561       | 6.43E-07 | 0.092 | 3.7-4.4     | 9            |
| 2 Deoxycytidine        | 1    | rs31934447 | 11125015      | 1.85E-06 | 0.12  | 9.5-12.9    | 15           |
| 5 Adenosylhomocysteine | 9    | rs51650764 | 108758191     | 3.49E-06 | 0.18  | 107.5-108.8 | 44           |
| Xanthosine             | 9    | rs30133859 | 86031934      | 8.09E-07 | 0.49  | 85.3-88.0   | 12           |

## Supplemental Experimental Procedures

**Hyperinsulinemic-euglycemic clamp studies.** At 20 weeks of age, dual catheters were surgically placed in the right jugular vein and glucose clamp studies were performed 3 days post-surgery as previously described (Hevener et al., 2003; Hevener et al., 2007; Ribas et al., 2011). Briefly, all animals were fasted for 6 hours prior to the clamp and studied in the conscious state. Basal glucose turnover was determined following a 90-minute constant infusion of (5.0  $\mu\text{Ci/h}$ , 0.12 ml/h) of [ $3\text{-}^3\text{H}$ ] D-glucose (Perkin Elmer). After the basal period, glucose (50% dextrose, Abbott Laboratories) and insulin (8 mU/kg/min, Novo Nordisk Pharmaceutical Industries) plus tracer (5.0  $\mu\text{Ci/h}$ ) infusions were initiated simultaneously, and glucose levels clamped at euglycemia using a variable glucose infusion rate (GIR). At steady state the total glucose disposal rate (GDR), measured by tracer dilution technique, is equal to the sum of the rate of endogenous or hepatic glucose production (HGP) and the exogenous (cold) glucose infusion rate (GIR)(Hevener et al., 2003; Hevener et al., 2007; Steele, 1959). The insulin-stimulated component of the total GDR (IS-GDR) is equal to the total GDR minus the basal glucose turnover rate.

**Ex-vivo soleus muscle strip glucose uptake.** Whole muscle ex-vivo glucose uptake was assessed using 2-deoxyglucose, with minor changes to that described previously (McCurdy and Cartee, 2005; Ribas et al., 2011). Briefly, soleus muscles were carefully excised from anaesthetized animals and immediately incubated for 30 minutes at 35°C in complete Krebs-Henseleit buffer with or without 60 $\mu\text{U/ml}$  insulin. Muscles were then transferred to the same buffer containing 3mCi/ml  $^3\text{H}$ -2-deoxy-glucose and 0.053mCi/ml  $^{14}\text{C}$ -mannitol, and incubated for exactly 20 minutes prior to snap freezing. Muscles were homogenized in lysis buffer and counted for radioactivity or subjected to western blotting. Glucose uptake was standardized to the non-specific uptake of mannitol and expressed as  $\mu\text{mol}$  of glucose uptake per gram of tissue.

**Association Analysis.** Genotypes for all strains of mice (**Table S1**) were obtained from Jackson Laboratories using the Mouse Diversity Array (Yang et al., 2009). After removing SNPs that were flagged as poor quality, 459,911 SNPs remained. Genome-wide association of clinical traits, adipose and liver expression data was performed using FaST-LMM which uses a linear mixed model to correct for population structure (Lippert et al., 2011). Our analyses indicate this

method can appropriately account for the population structure; however, it is possible that small segments of relatedness on certain chromosomes might be confounding. The SNPs used were filtered to have a minor allele frequency of  $>5\%$  and missing genotype rate  $<10\%$ . To avoid proximal contamination and still achieve a reasonable run-time, the following procedure was used: when testing the SNPs on each chromosome N for association, the relatedness matrix used to correct for population structure was generated from all the SNPs not on chromosome N. Significance threshold of  $(3.46 \times 10^{-6})$  was determined through permutation and modeling (Bennett et al., 2010). Linkage disequilibrium (LD) was determined by calculated pairwise  $r^2$  SNP correlations for each chromosome. LD boundaries were determined by visualizing  $r^2 > 0.8$  correlations in MATLAB (MathWorks).

## Supplemental References

Bennett, B.J., Farber, C.R., Orozco, L., Kang, H.M., Ghazalpour, A., Siemers, N., Neubauer, M., Neuhaus, I., Yordanova, R., Guan, B., *et al.* (2010). A high-resolution association mapping panel for the dissection of complex traits in mice. *Genome Res* 20, 281-290.

Hevener, A.L., He, W., Barak, Y., Le, J., Bandyopadhyay, G., Olson, P., Wilkes, J., Evans, R.M., and Olefsky, J. (2003). Muscle-specific Pparg deletion causes insulin resistance. *Nat Med* 9, 1491-1497.

Hevener, A.L., Olefsky, J.M., Reichart, D., Nguyen, M.T., Bandyopadhyay, G., Leung, H.Y., Watt, M.J., Benner, C., Febbraio, M.A., Nguyen, A.K., *et al.* (2007). Macrophage PPAR gamma is required for normal skeletal muscle and hepatic insulin sensitivity and full antidiabetic effects of thiazolidinediones. *J Clin Invest* 117, 1658-1669.

Lippert, C., Listgarten, J., Liu, Y., Kadie, C.M., Davidson, R.I., and Heckerman, D. (2011). FaST linear mixed models for genome-wide association studies. *Nat Methods* 8, 833-835.

McCurdy, C.E., and Cartee, G.D. (2005). Akt2 is essential for the full effect of calorie restriction on insulin-stimulated glucose uptake in skeletal muscle. *Diabetes* 54, 1349-1356.

Ribas, V., Drew, B.G., Le, J.A., Soleymani, T., Daraei, P., Sitz, D., Mohammad, L., Henstridge, D.C., Febbraio, M.A., Hewitt, S.C., *et al.* (2011). Myeloid-specific estrogen receptor alpha deficiency impairs metabolic homeostasis and accelerates atherosclerotic lesion development. *Proc Natl Acad Sci U S A* 108, 16457-16462.

Steele, R. (1959). Use of C14-glucose to measure hepatic glucose production following an intravenous glucose load or after injection of insulin. *Metabolism* 8, 512-519.

Yang, H., Ding, Y., Hutchins, L.N., Szatkiewicz, J., Bell, T.A., Paigen, B.J., Graber, J.H., de Villena, F.P., and Churchill, G.A. (2009). A customized and versatile high-density genotyping array for the mouse. *Nat Methods* 6, 663-666.
